# Supplementary material for: Nacre-inspired highly stretchable piezoresistive Cu–Ag nanowire/graphene synergistic conductive networks for strain sensors and beyond
Source: Royal Society of Chemistry journal article supplement (doi:10.1039/c9tc00943d), 2019-01-01
Supplement: c9tc00943d1.pdf [file c9tc00943d1.pdf]

## Supporting information

### Nacre-inspired Highly Stretchable Piezoresistive Cu-Ag Nanowires/Graphene Synergistic Conductive Network for Strain Sensor and Beyond

Xiangying Meng,<sup>a</sup> Songfang Zhao,<sup>a,\*</sup> Zhe Zhang,<sup>a</sup> Ruliang Zhang,<sup>b</sup> Jinhui Li,<sup>c</sup> Jinfeng Leng,<sup>a</sup> Duxia Cao,<sup>a,\*</sup> Guoping Zhang,<sup>c,\*</sup> Rong Sun<sup>c</sup>

<sup>a</sup>School of Materials Science and Engineering, University of Jinan, Jinan 250022, Shandong, China

<sup>b</sup>School of Materials Science and Engineering, Shandong University of Science and Technology, Qingdao 266590, China

<sup>c</sup>Guangdong Provincial Key Laboratory of Materials for High Density Electronic Packaging, Shenzhen Institutes of Advanced Technology, Chinese Academy of Sciences, Shenzhen 518055, China

\*To whom correspondence should be addressed: zhaosongfang@163.com, duxiacao@ujn.edu.cn, gp.zhang@siat.ac.cn

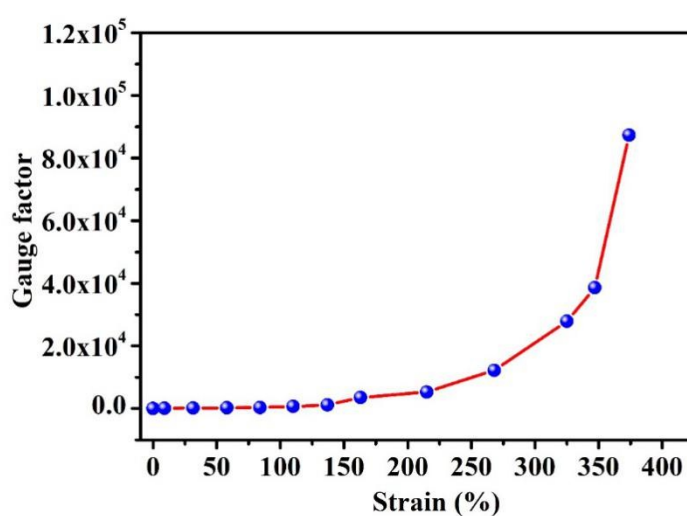

Fig. S1 Gauge factor vs. stretching strain

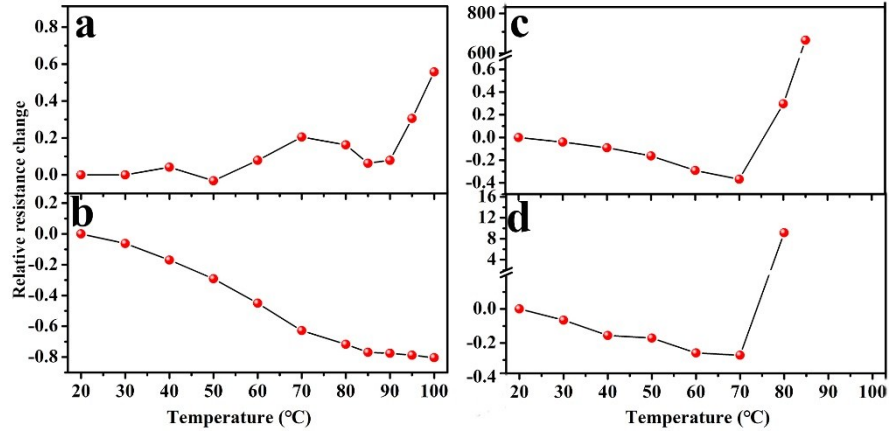

**Fig. S2** Plot of relative resistance change vs. Temperature at certain strain: (a) 0%, (b) 50%, (c) 100%, (d) 200%

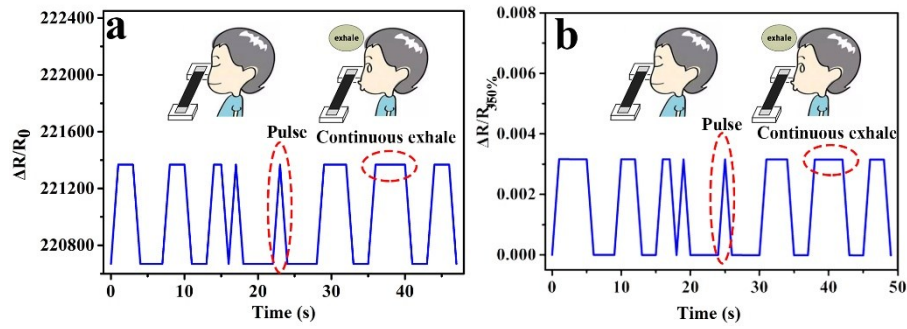

**Figure S3.** Relative resistance responses of pre-stretched (350%) biomimetic strain sensor in monitoring breathing: (a) relative resistance change based on  $R_0$ ; (b) relative resistance change based on  $R_{350\%}$ .

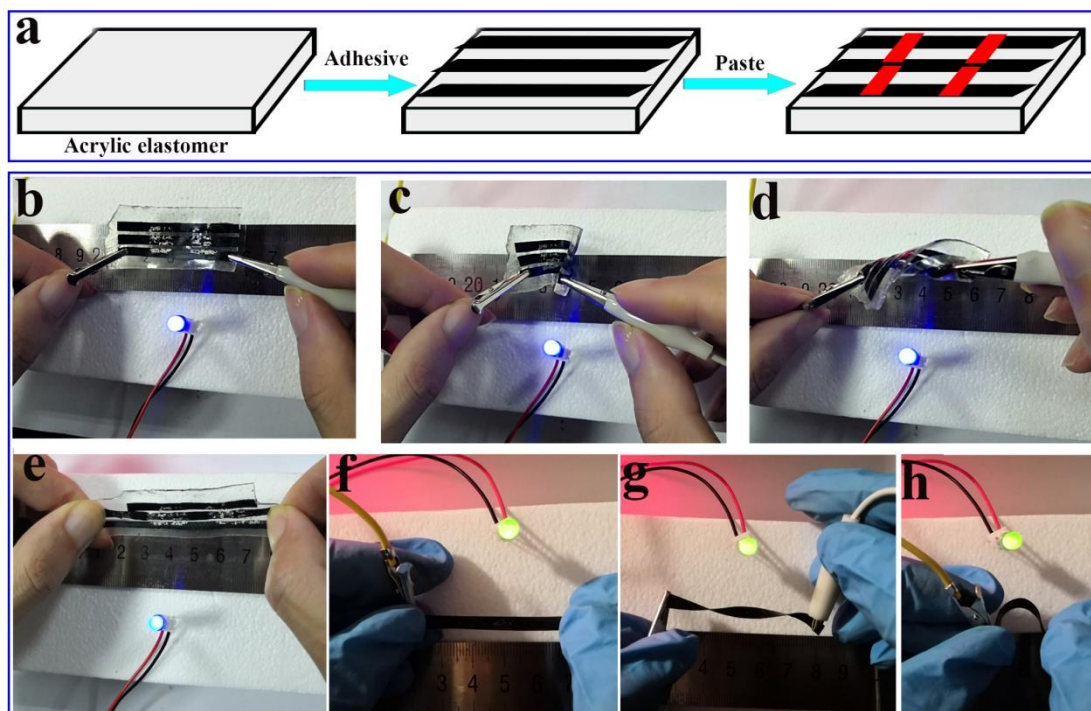

**Fig. S4** (a) Schematic diagram of the preparation process of the parallel circuit. (b-e) Optical image of LED lamp in parallel circuit: initial, bending, twisting and tensile state, respectively. (f-h) Optical image of a LED lamp in a series circuit: initial, bending, twisting single conductor.
